# Supplementary material for: Reconfiguration of Gut Microbiota and Reprogramming of Liver Metabolism with Phycobiliproteins Bioactive Peptides to Rehabilitate Obese Rats
Source: MDPI journal article supplement (doi:10.3390/nu14173635), 2022-09-02
Supplement: s1 [file s1]

**Table S1. The primer sequences used in this study.**

| Gene                            | Sequence (5' to 3') |                           |
|---------------------------------|---------------------|---------------------------|
| <i><math>\beta</math>-actin</i> | Forward             | CCCGCGAGTACAACCTTCTTG     |
|                                 | Reverse             | ACCCATACCCACCATCACAC      |
| <i>GAPDH</i>                    | Forward             | GCAAGTTCAACGGCACAG        |
|                                 | Reverse             | GCCAGTAGACTCCACGACAT      |
| <i>IRS1</i>                     | Forward             | ATGTCGCCAGTGGGAGATT       |
|                                 | Reverse             | CTTCGGCAGTTGCGGTATA       |
| <i>IRS2</i>                     | Forward             | CAGCACCTACGCAAGCATCG      |
|                                 | Reverse             | CCGCAGCACTTTACTCTTTCACC   |
| <i>Akt2</i>                     | Forward             | TTCTACAACCAGGACCACGAGC    |
|                                 | Reverse             | TGATGCTGAGGAAGAACCGATG    |
| <i>Pi3K</i>                     | Forward             | CCTCTCCTTATAAAGCTCCTGGAA  |
|                                 | Reverse             | GATCACAATCAAGAAGCTGTCGTAA |
| <i>Gsk3<math>\beta</math></i>   | Forward             | TTAAGGAAGGAAAAGGTGAATCGA  |
|                                 | Reverse             | CCAAAAGCTGAAGGCTGCTG      |
| <i>Gys</i>                      | Forward             | TCCTCAGTACCACCTTCC        |
|                                 | Reverse             | AGCCTCCTCTTCCTCATC        |
| <i>FBP</i>                      | Forward             | GTCCTATGCTACCTGTGTC       |
|                                 | Reverse             | TTCTCCGAAGGCTCATTAG       |
| <i>G6Pase</i>                   | Forward             | GAAGGCCAAGAGATGGTGTGA     |
|                                 | Reverse             | TGCAGCTCTTGCGGTACATG      |
| <i>PEPCK</i>                    | Forward             | CCCAGGAAGTGAGGAAGTTTGT    |
|                                 | Reverse             | GGAGCCGTCGCAGATGTG        |
| <i>FoxO1</i>                    | Forward             | GCATCCATGGACAACAACAG      |
|                                 | Reverse             | TGATGGTGCTAGCGTTTGAG      |
| <i>CD36</i>                     | Forward             | AGGCTGTTGAGCACACCTTGAAC   |
|                                 | Reverse             | TGAGCCTTCACTGTCTGTTGGAAC  |

|             |         |                       |
|-------------|---------|-----------------------|
| <i>ACC</i>  | Forward | CAATCCTCGGCACATGGAGA  |
|             | Reverse | GCTCAGCCAAGCGGATGTAGA |
| <i>FASN</i> | Forward | CAGGTGTGTGATGGGAAG    |
|             | Reverse | TGTGGATGATGTTGATGATAG |
| <i>CPT1</i> | Forward | CCCTAAGCCCACAAGGCTAC  |
|             | Reverse | TCTCTGTCCTCCCTTCTCGG  |

**Table S2. The weight changes of rats during establishment of obesity model.**

| Group                     | Initial weight<br>(g) | Obesity model weight<br>(g) | Number of rats |
|---------------------------|-----------------------|-----------------------------|----------------|
| Chow diet control group   | 201.33 ± 3.14         | 447.83 ± 19.91              | 6              |
| High fat diet model group | 202.48 ± 4.01         | 538.81 ± 24.86 **           | 24             |

Compared with chow diet control group \*\* p<0.01

**Table S3. The serum triglyceride (TG) and total cholesterol (TC) contents (mmol/L) of rats during establishment of obesity model.**

| Group                     | TG contents<br>(mmol/L) | TC contents (mmol/L) | Number of<br>rats |
|---------------------------|-------------------------|----------------------|-------------------|
| Chow diet control group   | 0.808 ± 0.017           | 2.269 ± 0.028        | 6                 |
| High fat diet model group | 0.913 ± 0.022*          | 2.413 ± 0.025        | 24                |

Compared with chow diet control group \* p<0.05

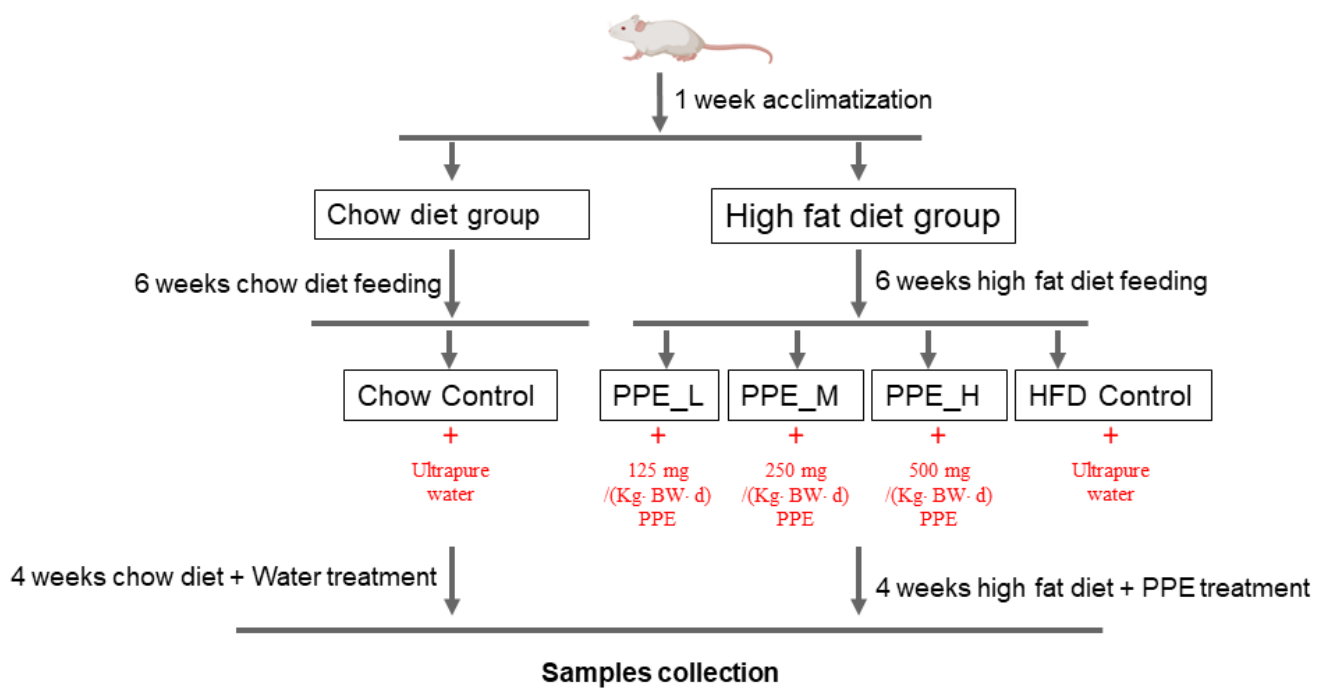

**Figure S1. The experimental schedule and grouping information.**

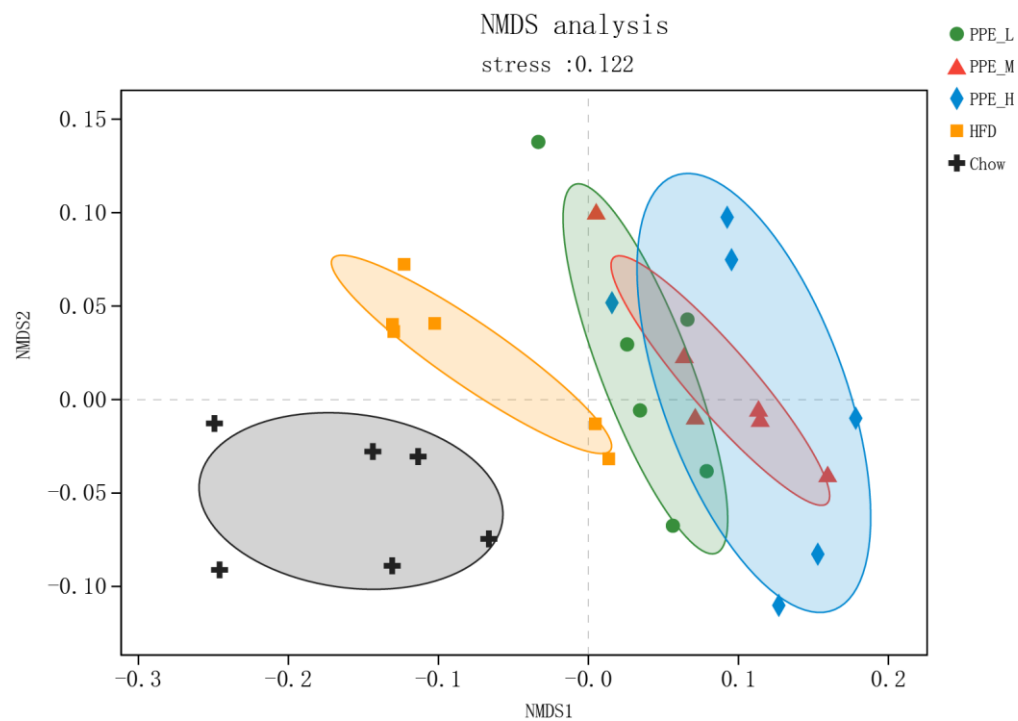

**Figure S2. Gut microbiota composition in rats from different groups assessed by NMDS.**

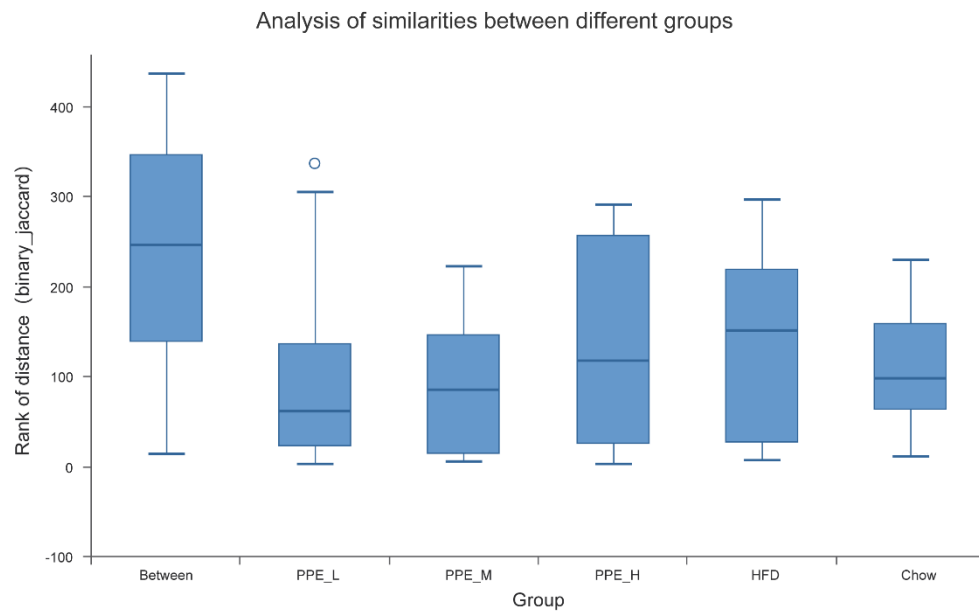

**Figure S3.** Gut microbiota composition in rats from different groups assessed by ANOSM.

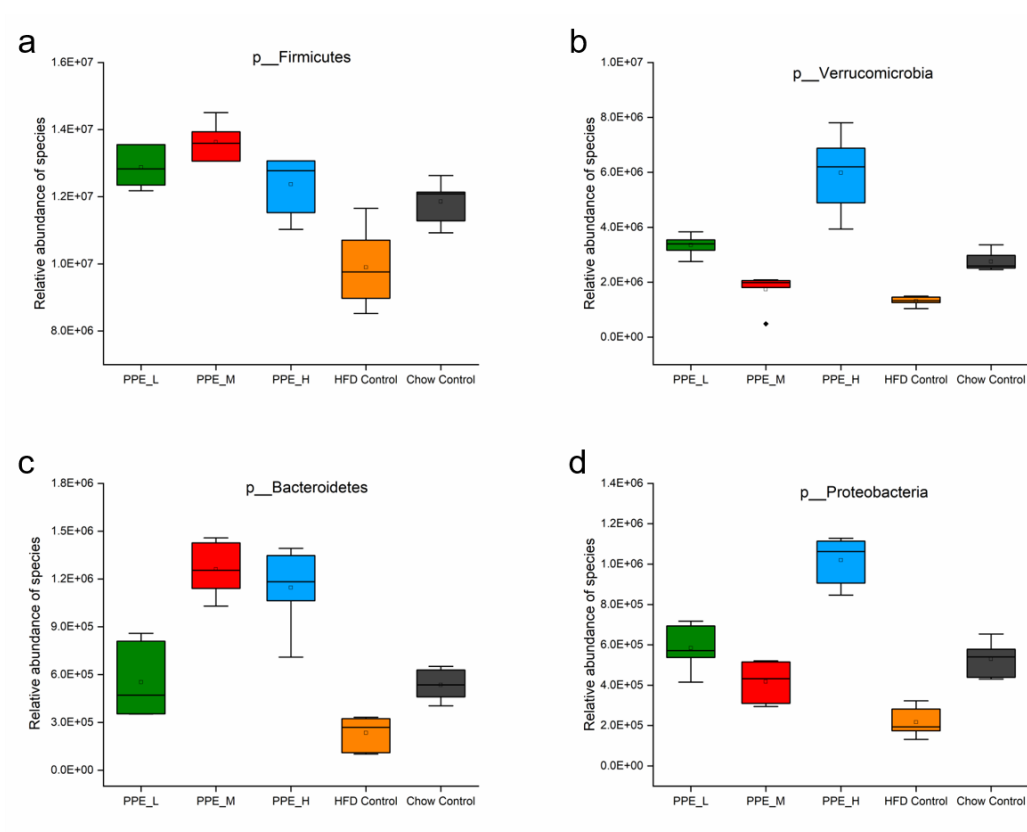

**Figure S4.** PPE modulate gut microbiota composition at the phylum level. Firmicutes (a),

**Verrucomicrobia (b), Bacteroidetes (c) and Proteobacteria (d).**

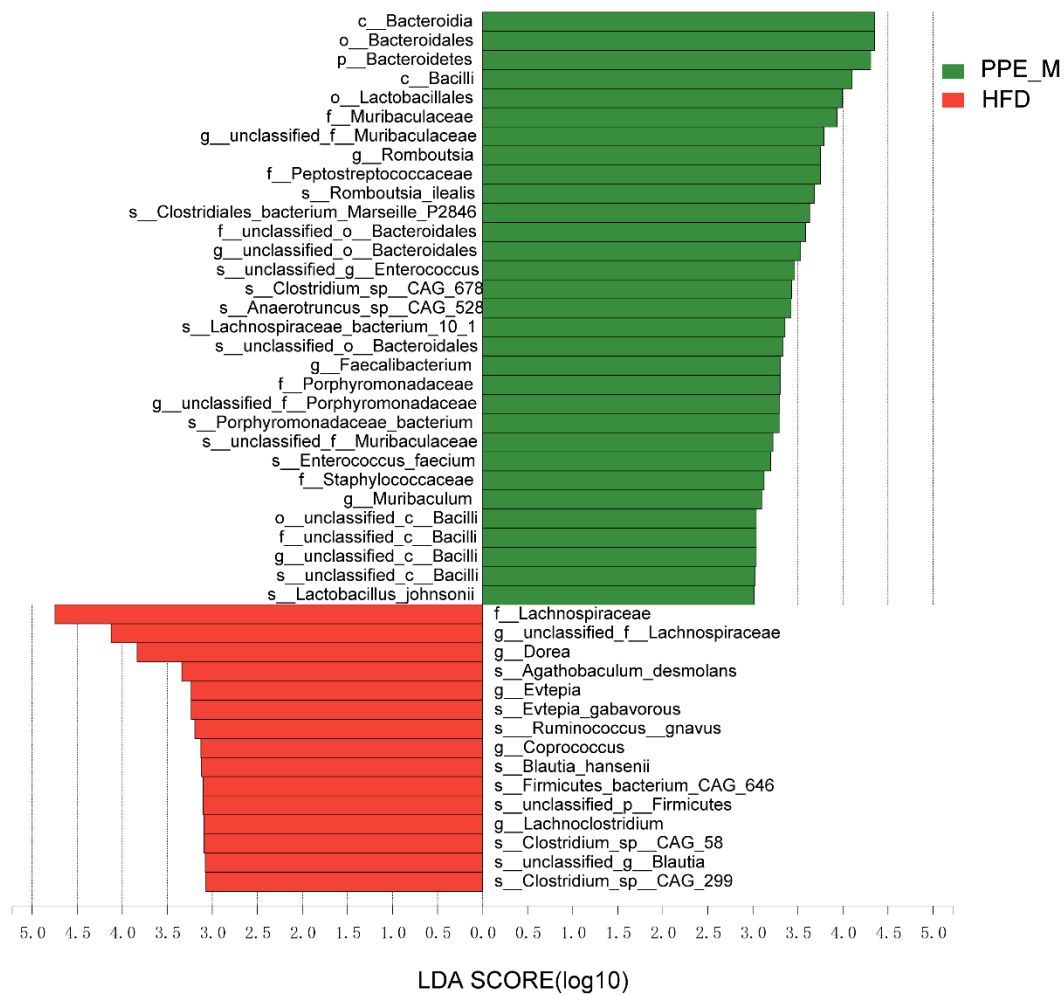

**Figure S5. Cladogram obtained from LEfSe analysis (LDA > 3), showing the most differentially abundant taxa enriched in microbiota from rats in PPE\_M (green) and HFD control (red) groups.**

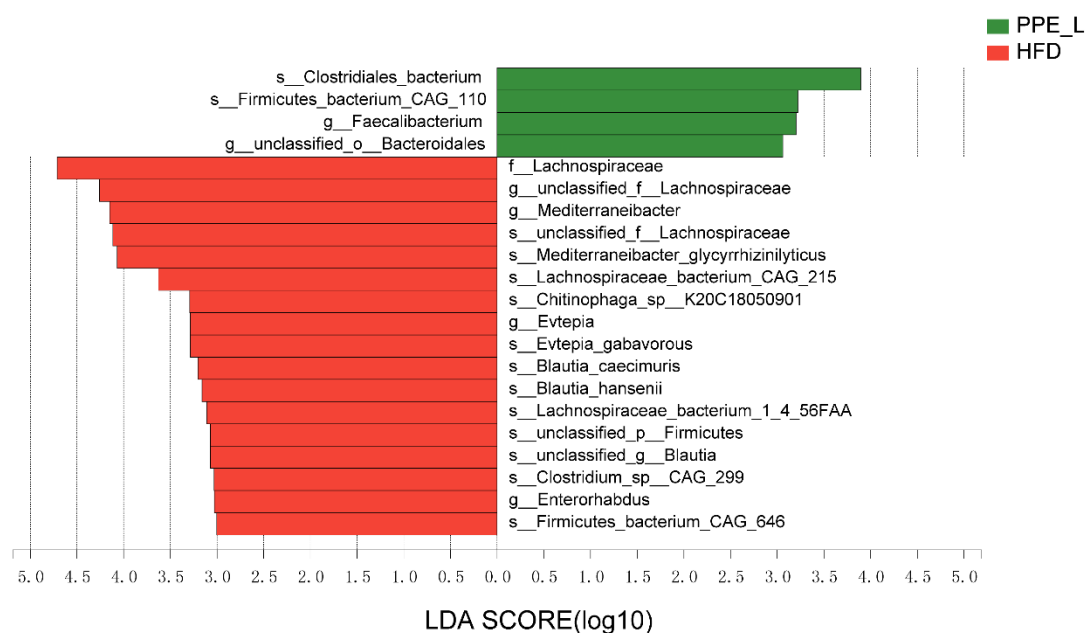

**Figure S6.** Cladogram obtained from LEfSe analysis (LDA > 3), showing the most differentially abundant taxa enriched in microbiota from rats in PPE\_L (green) and HFD control (red) groups.

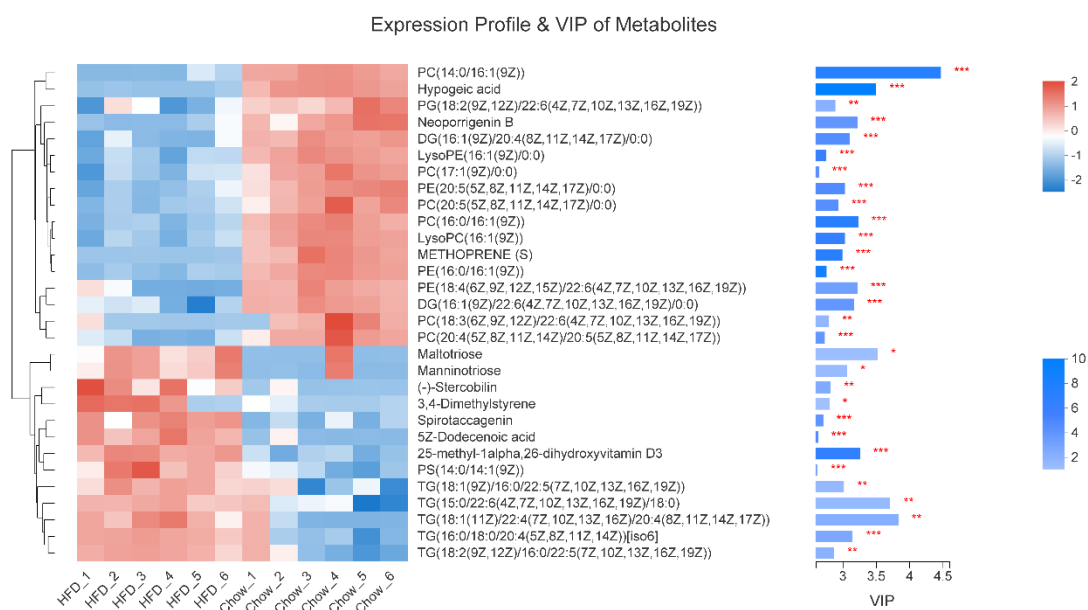

**Figure S7.** Expression profile and VIP score (OPLS-DA) of significantly different metabolites (top 30 are shown, \* represents  $P < 0.05$ , \*\* represents  $P < 0.01$ , \*\*\* represents  $P < 0.001$ ) between Chow diet & HFD diet (n = 6 rats in each group).

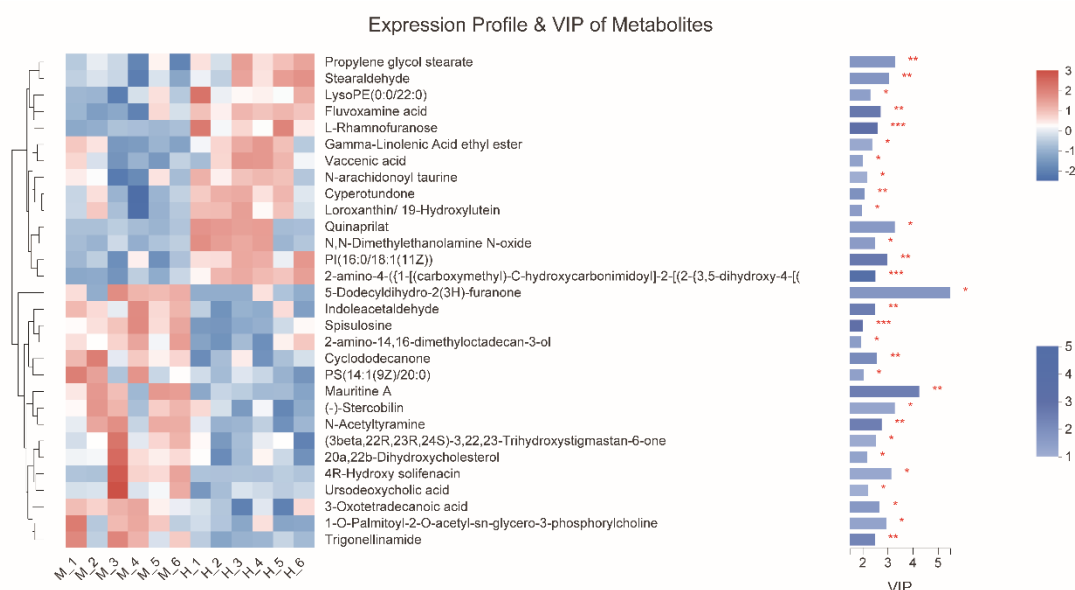

**Figure S8. Expression profile and VIP score (OPLS-DA) of significantly different metabolites (top 30 are shown, \* represents  $P<0.05$ , \*\* represents  $P<0.01$ , \*\*\* represents  $P<0.001$ ) between PPE\_M diet & HFD diet (n = 6 rats in each group).**

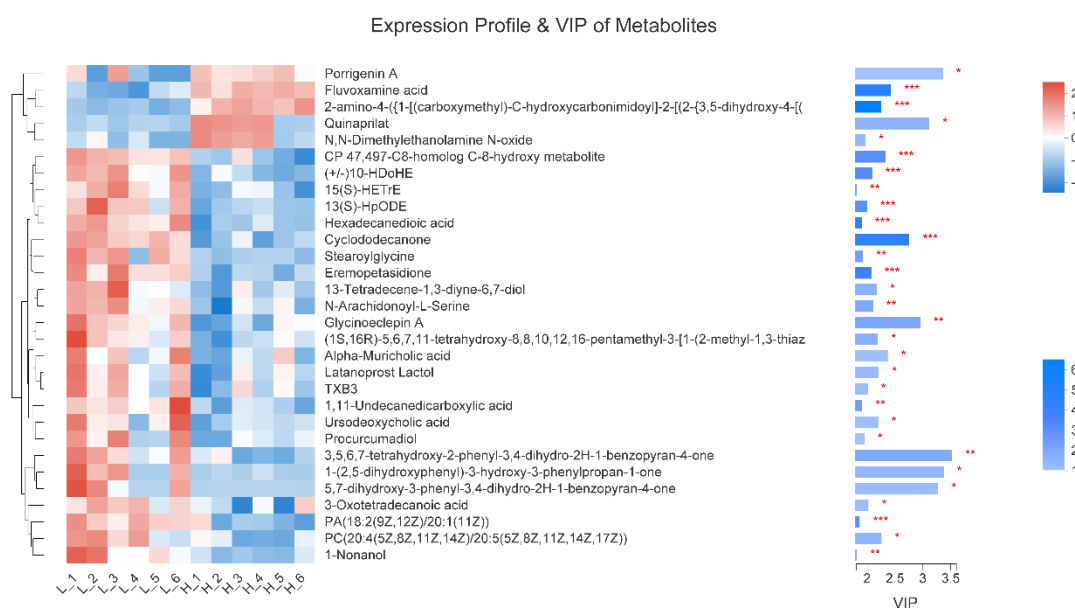

**Figure S9. Expression profile and VIP score (OPLS-DA) of significantly different metabolites (top 30 are shown, \* represents  $P<0.05$ , \*\* represents  $P<0.01$ , \*\*\* represents  $P<0.001$ ) between PPE\_M diet & HFD diet (n = 6 rats in each group).**

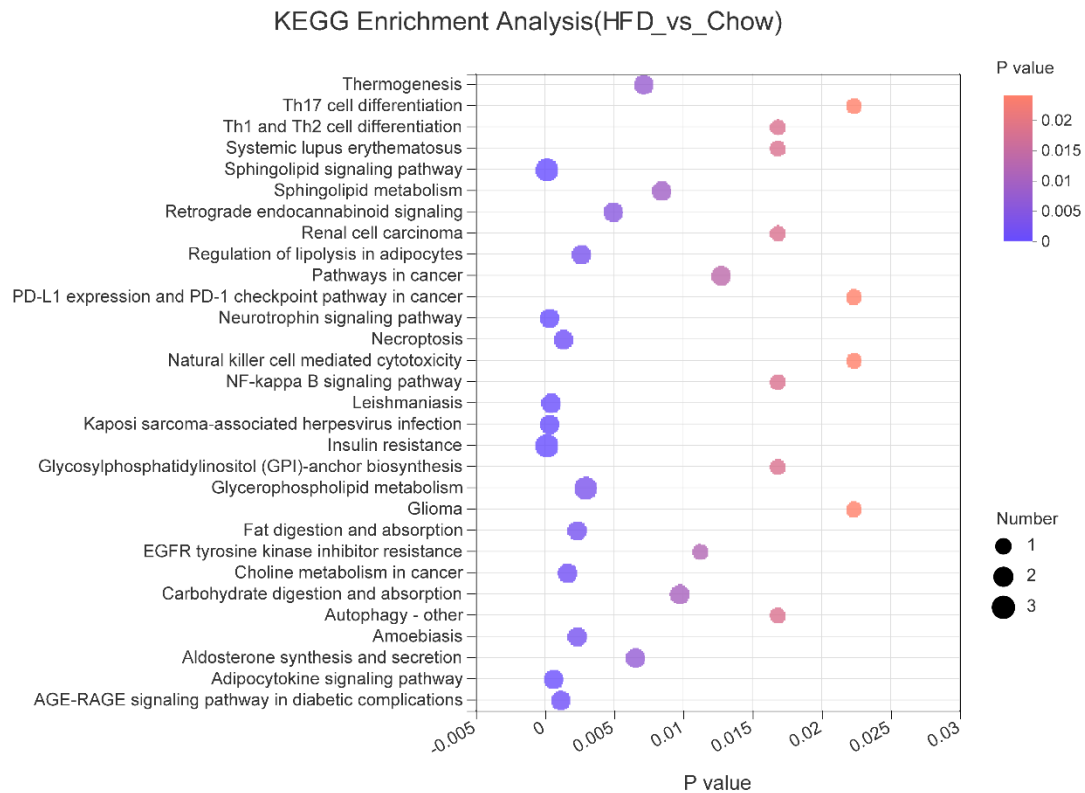

**Figure S10. KEGG enrichment analysis (top 30 are shown) between PPE\_M diet & HFD diet between Chow diet & HFD diet. (n = 6 rats in each group).**

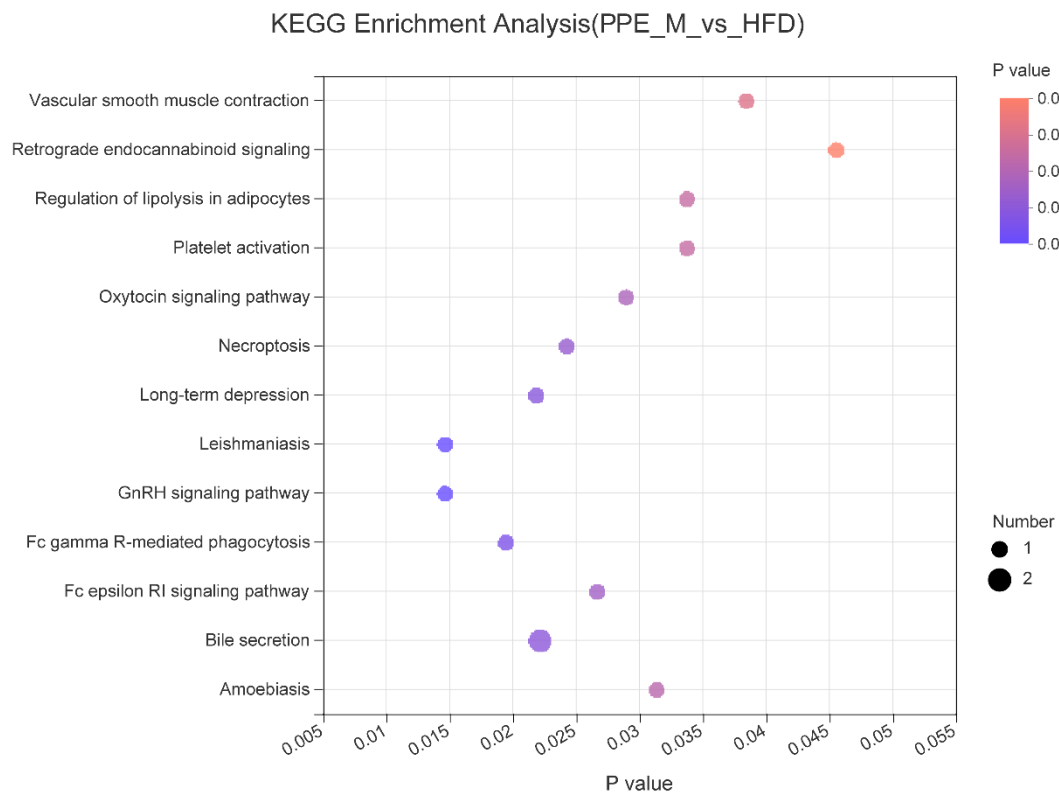



**Figure S11. KEGG enrichment analysis (top 30 are shown) between PPE\_M diet & HFD diet between PPE\_M diet & HFD diet. (n = 6 rats in each group).**

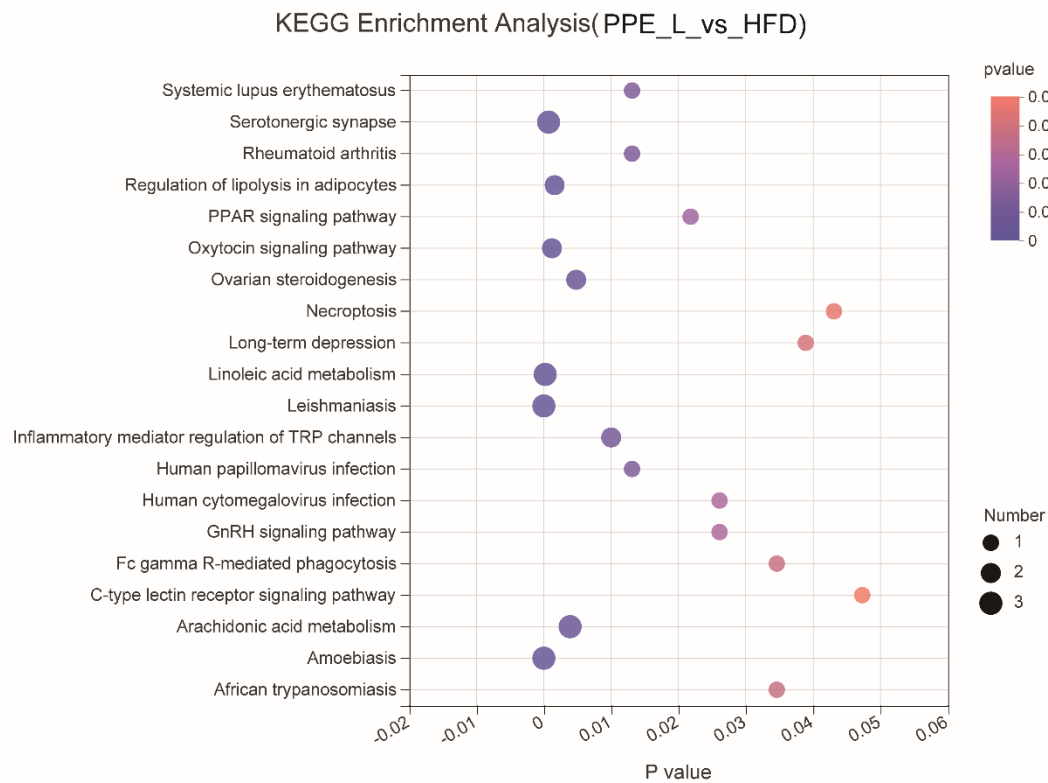

**Figure S12. KEGG enrichment analysis (top 30 are shown) between PPE\_M diet & HFD diet between PPE\_L diet & HFD diet. (n = 6 rats in each group).**
